# Supplementary material for: Spatial phylogenetics of Japanese ferns: Patterns, processes, and implications for conservation
Source: bioRxiv or medRxiv preprint supplement (doi:10.1101/2021.08.26.457744), 2022-01-22
Supplement: Supplementary file [file media-2.pdf]

## Appendix S2: Data Exploration

Here we perform initial data exploration to determine the appropriate models to fit to the data.

All code is in R, and workflow managed with the `targets` package (<https://github.com/ropensci/targets>).

The code here is included in the repo at [https://github.com/joelnitta/japan\\_ferns\\_spatial\\_phy](https://github.com/joelnitta/japan_ferns_spatial_phy).

### Setup

Let's get started by loading packages and tidying our namespace:

```
# Load packages
library(tidyverse)
library(targets)
library(outliers)
library(ggforce)
library(assertr)
library(conflicted)

# Resolve possible namespace conflicts
conflict_prefer("map", "purrr")
conflict_prefer("select", "dplyr")
conflict_prefer("filter", "dplyr")
conflict_prefer("gather", "tidyr")
conflict_prefer("extract", "magrittr")
```

Also define a custom function we'll use later:

```
#' Run Grubb's test for outliers
#'
#' Similar to `outliers::grubbs.test()`, but returns the results in a tidy
#' dataframe
#'
#' @param x a numeric vector for data values.
#' @param type Integer value indicating test variant.
#' See `outliers::grubbs.test()`
#' @param ... Other arguments passed to `outliers::grubbs.test()`
#'
#' @return Tibble
grubbs_tidy <- function(x, type = 10, ...) {
  outliers::grubbs.test(x = x, type = type, ...) %>%
    broom::tidy() %>%
    dplyr::mutate(stat_name = c("g", "u")) %>%
```

```
tidyr::pivot_wider(
  values_from = "statistic",
  names_from = "stat_name") %>%
janitor::clean_names() %>%
dplyr::select(g, u, p_value, method, alternative)
}
```

## Load data

The dataset includes biodiversity metrics and environmental data measured on native, non-hybrid ferns of Japan.

All biodiversity metrics were calculated during the targets workflow (`_targets.R`), and are contained in the `biodiv_ferns_cent_figshare` object in the targets cache.

The next step uses `tar_load()` to load the dataset from the targets cache. Alternatively, this can be loaded from the data file as shown in the commented-out code below.

```
# Load the data from the targets workflow
tar_load(biodiv_ferns_cent_figshare)

# Alternatively, unzip `results.zip`
# (FIXME: add DOI when available)
# and read in the data from there
# biodiv_ferns_cent_figshare <- read_csv(here::here("japan_ferns_biodiv.csv"))
```

This dataframe actually has more variables than are needed for modeling, so we will subset it to only the relevant variables.

```
biodiv_ferns_cent_raw <-
  biodiv_ferns_cent_figshare %>%
  select(
    grids, lat, long, # grid-cell ID, latitude, longitude
    richness, pd_obs_z, fd_obs_z, rpd_obs_z, rfd_obs_z, # response vars
    percent_apo, temp, precip, precip_season, lat_area # independent vars
  )
```

```
biodiv_ferns_cent_raw
```

```
## # A tibble: 1,239 x 13
##   grids  lat  long richness pd_obs_z fd_obs_z rpd_obs_z rfd_obs_z percent_apo
##   <chr> <dbl> <dbl>   <int>   <dbl>   <dbl>   <dbl>   <dbl>   <dbl>
## 1 4      24.1 124.     12  -0.269   1.67    0.645    1.96     0
## 2 114    24.3 124.    116   4.83     5.26    7.22     7.50    0.0610
## 3 115    24.3 124.    152   5.82     4.33    9.66     5.89    0.0926
## 4 116    24.3 124.     88   2.46     4.09    5.18     6.37    0.102
## 5 221    24.5 123.     59   1.69     3.87    3.52     4.71    0.0238
## 6 224    24.5 124.     58   3.38     5.08    6.88     5.02    0.0652
## 7 225    24.5 124.     50   3.08     3.71    4.84     3.33    0.0811
## 8 226    24.5 124.    130   3.73     4.15    5.64     5.50    0.138
```

```
## 9 227 24.5 124. 49 1.27 2.15 2.70 3.04 0.0556
## 10 337 24.6 124. 22 -0.879 0.826 -0.318 1.37 0
## # ... with 1,229 more rows, and 4 more variables: temp <dbl>, precip <dbl>,
## # precip_season <dbl>, lat_area <dbl>
```

The columns are as follows:

- grids: ID code for each grid cell
- lat: latitude of grid cell centroid
- long: longitude of grid cell centroid
- richness: number of taxa
- pd\_obs\_z: standard effect size (SES) of phylogenetic diversity (pd)
- fd\_obs\_z: SES of functional diversity (fd)
- rpd\_obs\_z: SES of relative pd
- rfd\_obs\_z: SES of relative fd
- percent\_apo: percent of apogamous taxa in that grid cell
- temp: mean annual temperature (10 x °C)
- precip: total annual precipitation (mm)
- precip\_season: seasonality in precipitation
- lat\_area: rolling mean of area in 0.2 degree latitudinal bands

## Check for missing data

Check for missing data. If any rows are missing data, exclude them.

The next code chunk runs a logical check to see if any rows have missing data. It returns TRUE if there is no missing data, FALSE if there are any missing data:

```
biodiv_ferns_cent_raw %>%
  assert(
    not_na, everything(),
    error_fun = error_logical,
    success_fun = success_logical)
```

```
## [1] FALSE
```

At least one row has missing data. Let's see what variables are missing.

```
# Get the row numbers of rows with missing data
error_rows <-
  biodiv_ferns_cent_raw %>%
  assert(not_na, everything(), error_fun = error_df_return) %>%
  pull(index) %>%
  unique()

# Inspect the rows with missing data
biodiv_ferns_cent_raw %>%
  slice(error_rows) %>%
  select(grid, richness, percent_apo, temp, precip, precip_season)
```

```
## # A tibble: 3 x 6
```

```
## grids richness percent_apo temp precip precip_season
## <chr> <int> <dbl> <dbl> <dbl> <dbl>
## 1 4438 1 NA 192 1937 50
## 2 994 4 1 NaN NaN NaN
## 3 1103 48 0.0882 NaN NaN NaN
```

The missing data are due to two grid-cells that lack environmental data from the WorldClim dataset and one grid-cell that only had a single species with no breeding-system data. Let's remove these, then continue.

```
# Exclude rows with missing data
biodiv_ferns_cent_no_missing <-
  biodiv_ferns_cent_raw %>%
  slice(-error_rows)

# Double check that the resulting dataframe has no missing data
assert(biodiv_ferns_cent_no_missing,
  not_na, everything(),
  success_fun = success_logical)
```

```
## [1] TRUE
```

## Check for outliers

We will first check for outliers in the data by visualizing box plots. Dots at the extremes may be outliers.

```
biodiv_ferns_cent_no_missing %>%
  select(-lat, -long) %>%
  pivot_longer(-grids, names_to = "variable") %>%
  ggplot(aes(x = variable, y = value)) +
  geom_boxplot() +
  facet_wrap(vars(variable), scales = "free") +
  theme(
    axis.title.x = element_blank(),
    axis.text.x = element_blank()
  )
```

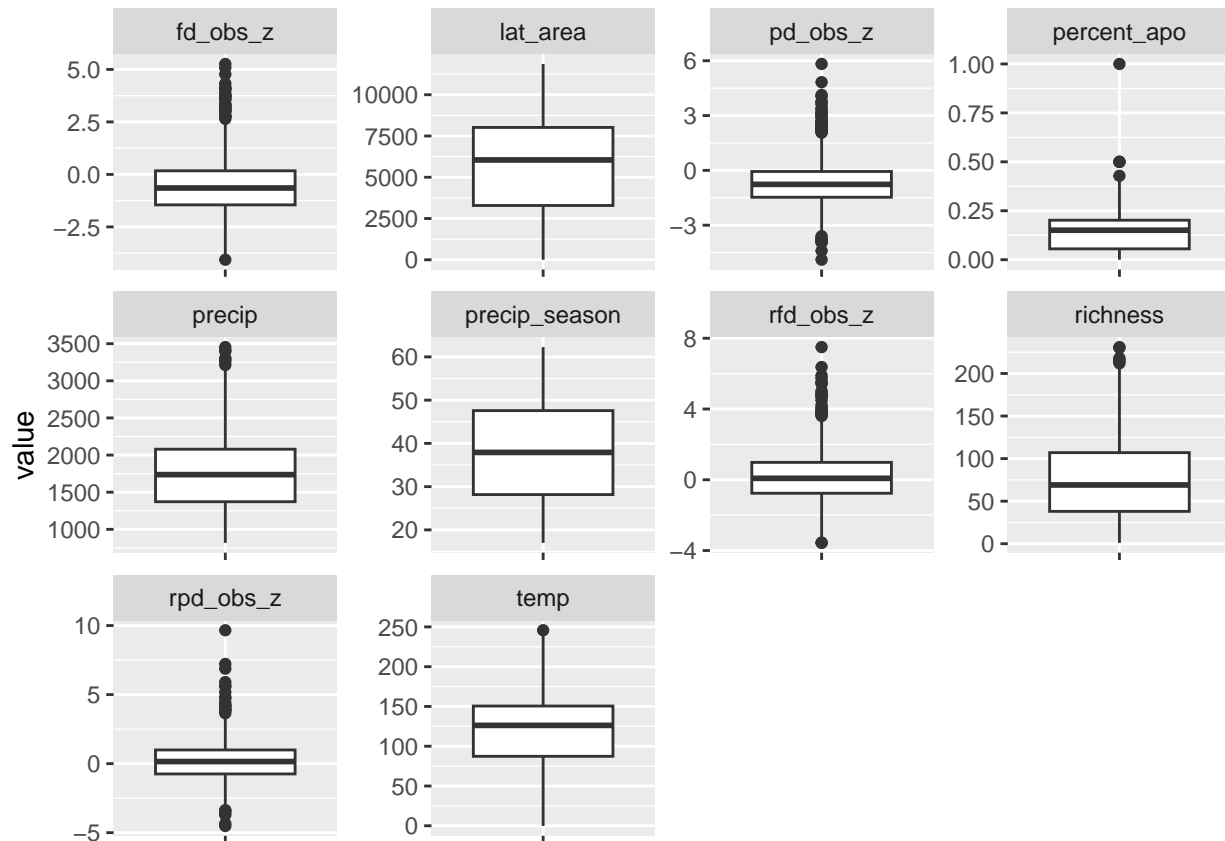

There are a few points beyond the whiskers that may be outliers. In particular, there is one value of `percent_apo` that seems quite outside the normal range.

Next, check for outliers using Grubb's test. Significant  $p$ -values indicate that the most extreme value is an outlier.

```
biodiv_ferns_cent_no_missing %>%
  select(-lat, -long) %>%
  pivot_longer(-grids, names_to = "variable") %>%
  group_by(variable) %>%
  nest() %>%
  mutate(map_df(data, ~grubbs_tidy(.$value))) %>%
  select(-data) %>%
  ungroup() %>%
  select(variable:p_value) %>%
  mutate(signif = p_value < 0.05)
```

```
## # A tibble: 10 x 5
##   variable      g      u      p_value signif
##   <chr>      <dbl> <dbl>      <dbl> <lgl>
## 1 richness    3.28 0.991 0.619     FALSE
## 2 pd_obs_z    5.14 0.979 0.000148  TRUE
## 3 fd_obs_z    4.38 0.984 0.00677   TRUE
## 4 rpd_obs_z   6.78 0.963 0.00000000494 TRUE
## 5 rfd_obs_z   5.36 0.977 0.0000430  TRUE
```

```
## 6 percent_apo    9.67 0.924 0          TRUE
## 7 temp           2.82 0.994 1          FALSE
## 8 precip         3.60 0.989 0.189      FALSE
## 9 precip_season  2.17 0.996 1          FALSE
## 10 lat_area      1.85 0.997 1          FALSE
```

Grubb's test confirms that the percent apomictic value is an outlier. It also indicates that the highest values of the variables `fd_obs_z`, `pd_obs_z`, `rfd_obs_z`, and `rpd_obs_z` may be outliers.

One reason for artificially extreme values could be undersampling of species. Let's check richness of these possible outlier grid-cells.

```
biodiv_ferns_cent_no_missing %>%
  slice_max(n = 1, order_by = percent_apo, with_ties = TRUE) %>%
  select(grid:long, percent_apo, richness)
```

```
## # A tibble: 1 x 5
##   grids  lat  long percent_apo richness
##   <chr> <dbl> <dbl>         <dbl>    <int>
## 1 343    24.6  126.             1         1
```

There is just one species in the grid-cell that obviously contributes to the 100% apomixis rate. This data point should be excluded.

What about the other possible outliers?

```
biodiv_ferns_cent_no_missing %>%
  slice_max(n = 2, order_by = fd_obs_z) %>%
  select(grid:long, fd_obs_z, richness)
```

```
## # A tibble: 2 x 5
##   grids  lat  long fd_obs_z richness
##   <chr> <dbl> <dbl>         <dbl>    <int>
## 1 114    24.3  124.         5.26     116
## 2 224    24.5  124.         5.08     58
```

```
biodiv_ferns_cent_no_missing %>%
  slice_max(n = 2, order_by = pd_obs_z) %>%
  select(grid:long, pd_obs_z, richness)
```

```
## # A tibble: 2 x 5
##   grids  lat  long pd_obs_z richness
##   <chr> <dbl> <dbl>         <dbl>    <int>
## 1 115    24.3  124.         5.82     152
## 2 114    24.3  124.         4.83     116
```

```
biodiv_ferns_cent_no_missing %>%
  slice_max(n = 2, order_by = rfd_obs_z) %>%
  select(grid:long, rfd_obs_z, richness)
```

```
## # A tibble: 2 x 5
##   grids  lat  long rfd_obs_z richness
##   <chr> <dbl> <dbl>         <dbl>    <int>
```

```
## 1 114 24.3 124. 7.50 116
## 2 116 24.3 124. 6.37 88
```

```
biodiv_ferns_cent_no_missing %>%
  slice_max(n = 2, order_by = rpd_obs_z) %>%
  select(grid:long, rpd_obs_z, richness)
```

```
## # A tibble: 2 x 5
##   grids lat long rpd_obs_z richness
##   <chr> <dbl> <dbl> <dbl> <int>
## 1 115 24.3 124. 9.66 152
## 2 114 24.3 124. 7.22 116
```

None of these have an extremely low number of species.

So we will conservatively only remove the grid-cell with unusually high % apomictic taxa, then run Grubb's test again.

```
biodiv_ferns_cent_no_outliers <-
  biodiv_ferns_cent_no_missing %>%
  filter(percent_apo != max(percent_apo))
```

```
biodiv_ferns_cent_no_outliers %>%
  pull(percent_apo) %>%
  grubbs_tidy()
```

```
## # A tibble: 1 x 5
##       g      u p_value method alternative
##   <dbl> <dbl> <dbl> <chr> <chr>
## 1 4.23 0.985 0.0136 Grubbs test for one outlier highest value 0.5 is an outli~
```

OK, no more outliers in percent\_apo.

## Check for normality

Check for normality with histograms and QQ-plots after removing missing data and outliers.

First inspect histograms:

```
biodiv_ferns_cent_no_outliers %>%
  select(-lat, -long) %>%
  pivot_longer(-grids, names_to = "variable") %>%
  ggplot(aes(x = value)) +
  geom_histogram(bins = 30) +
  facet_wrap(vars(variable), scales = "free")
```

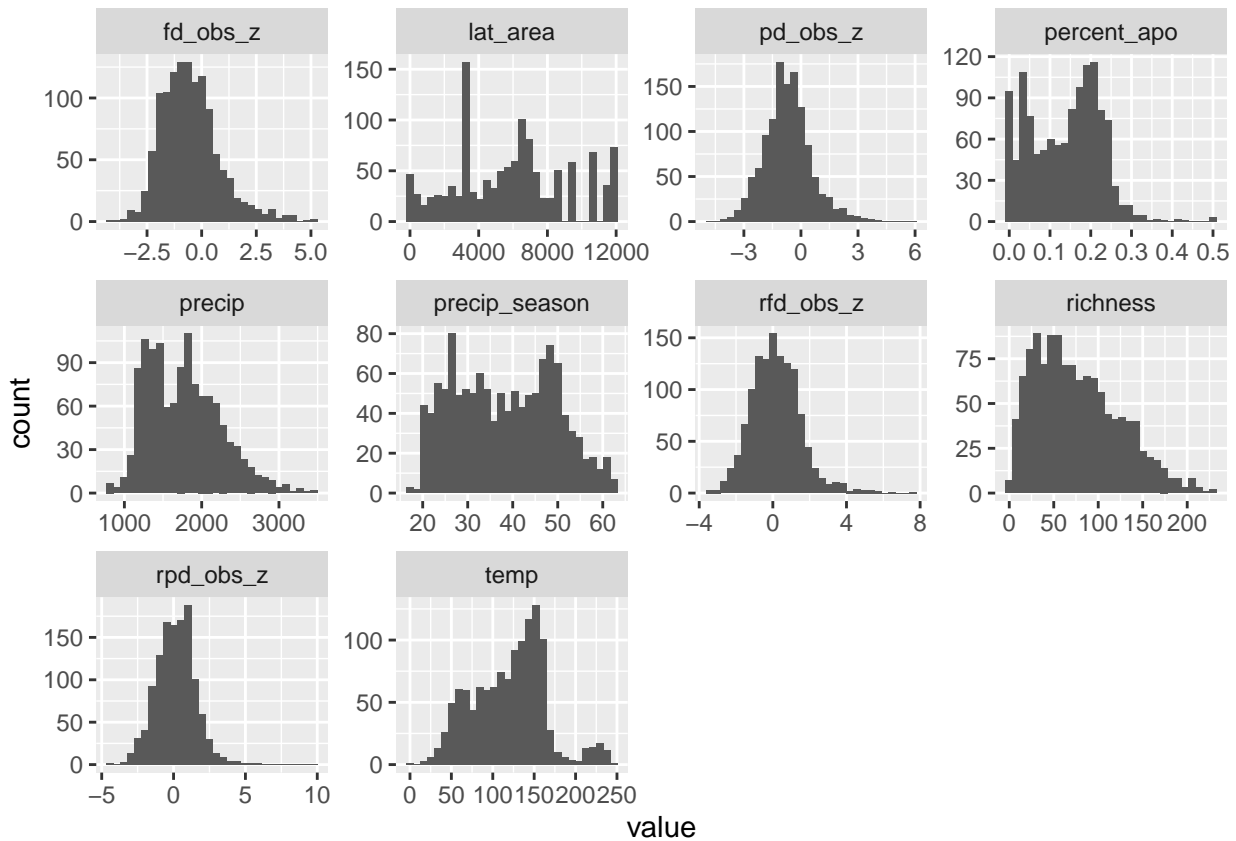

Next inspect qq-plots:

```
biodiv_ferns_cent_no_outliers %>%
  select(-lat, -long) %>%
  pivot_longer(-grids, names_to = "variable") %>%
  ggplot(aes(sample = value)) +
  stat_qq() +
  stat_qq_line() +
  facet_wrap(~variable, scales = "free")
```



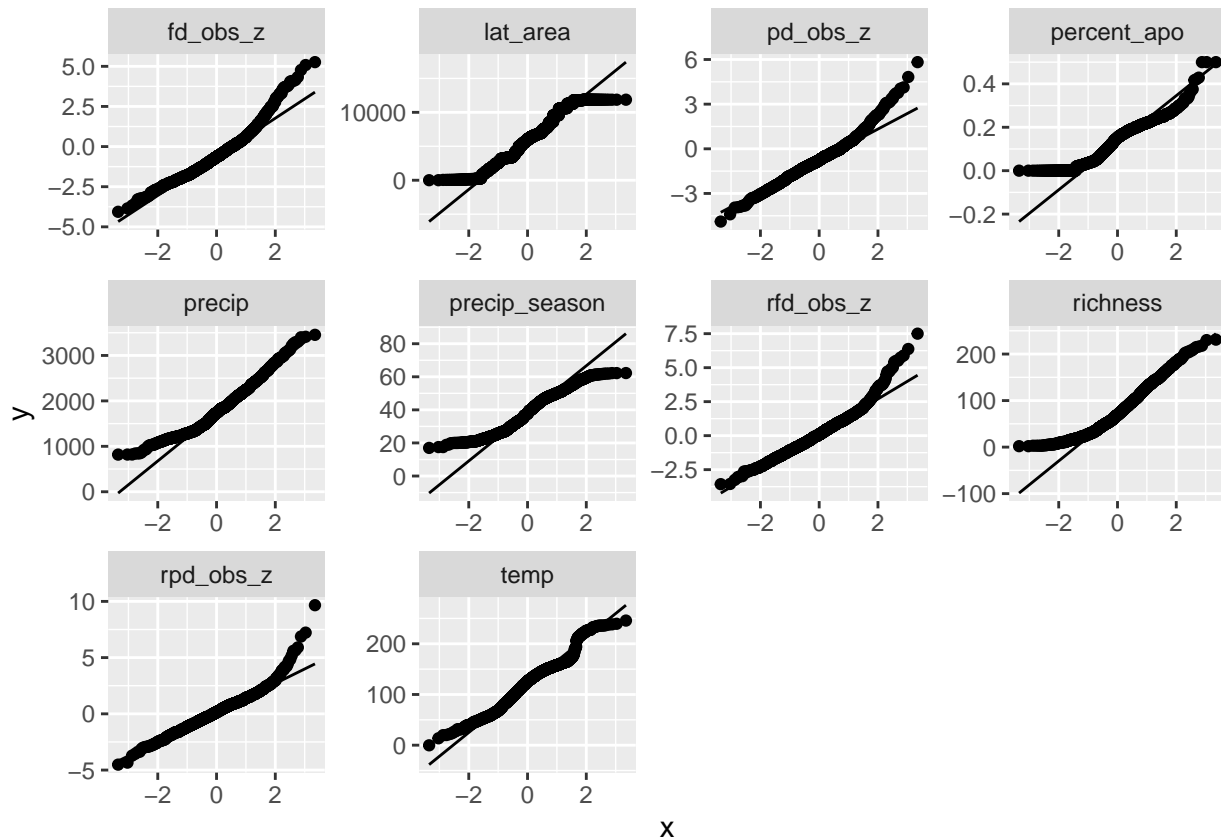

The response variables `fd_obs_z`, `pd_obs_z`, `rfd_obs_z`, `rpd_obs_z` all look decent. `richness` is skewed, but it is count data and we aren't using a Gaussian model for that anyways (poisson or negative binomial), so that's OK.

### Check for zeros in count data

Zero-inflated data can be a problem for linear models.

```
biodiv_ferns_cent_no_outliers %>%
  mutate(rich_zero = richness == 0) %>%
  arrange(richness) %>%
  summarize(
    total_zero = sum(rich_zero),
    perc_zero = sum(rich_zero) / nrow(.)
  )
```

```
## # A tibble: 1 x 2
##   total_zero perc_zero
##   <int>     <dbl>
## 1         0         0
```

No zeros in our count data (`richness`).

**Plot raw data**

Here we plot response variables (row labels) vs. indep variables (column labels) and add a trend line for each to get an idea of the possible model fits.

```
ggplot(biodiv_ferns_cent_no_outliers, aes(x = .panel_x, y = .panel_y)) +
  geom_point(alpha = 0.5, shape = 16, size = 0.5) +
  geom_smooth() +
  facet_matrix(
    cols = vars(temp, precip, precip_season, percent_apo),
    rows = vars(richness, pd_obs_z, fd_obs_z, rpd_obs_z, rfd_obs_z))
```

```
## Warning in rows == cols: longer object length is not a multiple of shorter
## object length
## `geom_smooth()` using method = 'gam' and formula 'y ~ s(x, bs = "cs")'
```

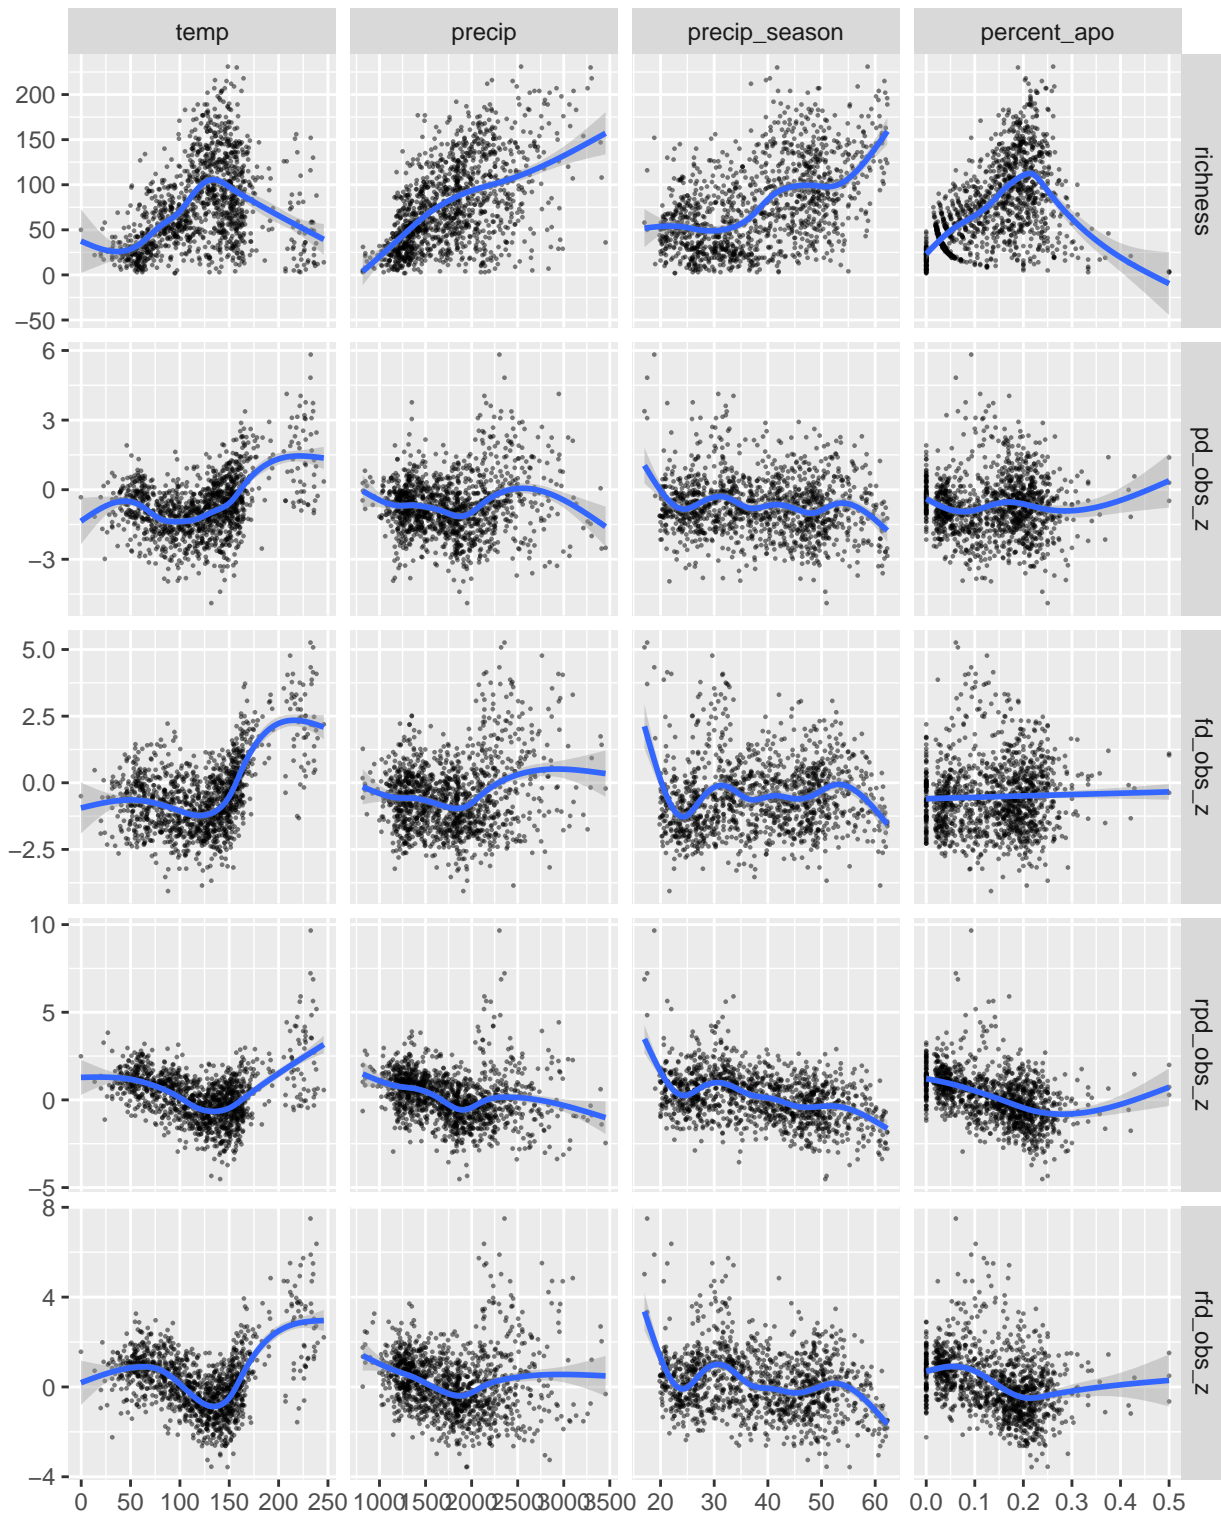

richness vs. temp definitely shows a hump-shaped trend line, and the other response variables vs. temp also show one if not quite as strongly. The other relationships appear to be linear or uncorrelated (the bend in the line for percent\_apo vs. richness seems to be due to a relatively few number of points with > 30% apomictic taxa, but otherwise it looks linear).

## Check for overdispersion in richness

Since richness is count data (only takes positive values), we will use either a poisson or negative binomial to model its distribution. The poisson distribution requires that the ratio of residual variance to degrees of freedom be approximately 1; significantly different ratios are “overdispersed” or “underdispersed”. Check for this with a dispersion test.

```
# Create general linear model with poisson distribution
richness_poisson_mod <- glm(
  richness ~ temp + I(temp^2) + precip + precip_season,
  data = biodiv_ferns_cent_no_outliers, family = poisson)

# Check ratio of residual variance to df
# (should be near 1 to meet poisson assumptions)
richness_poisson_mod$deviance / richness_poisson_mod$df.residual

## [1] 14.77217
```

That's very overdispersed. So we won't use poisson for richness, but negative binomial instead.

## Session information

```
sessionInfo()

## R version 4.1.2 (2021-11-01)
## Platform: x86_64-pc-linux-gnu (64-bit)
## Running under: Ubuntu 20.04.3 LTS
##
## Matrix products: default
## BLAS/LAPACK: /usr/lib/x86_64-linux-gnu/openblas-pthread/libopenblas-r0.3.8.so
##
## locale:
##  [1] LC_CTYPE=en_US.UTF-8      LC_NUMERIC=C
##  [3] LC_TIME=en_US.UTF-8      LC_COLLATE=en_US.UTF-8
##  [5] LC_MONETARY=en_US.UTF-8  LC_MESSAGES=C
##  [7] LC_PAPER=en_US.UTF-8    LC_NAME=C
##  [9] LC_ADDRESS=C            LC_TELEPHONE=C
## [11] LC_MEASUREMENT=en_US.UTF-8 LC_IDENTIFICATION=C
##
## attached base packages:
## [1] stats      graphics  grDevices datasets  utils      methods    base
##
## other attached packages:
##  [1] ggforce_0.3.3      outliers_0.14      forcats_0.5.1     stringr_1.4.0
##  [5] dplyr_1.0.7        purrr_0.3.4       readr_2.1.1       tidyr_1.1.4
##  [9] tibble_3.1.6       ggplot2_3.3.5.9000 tidyverse_1.3.1   rgnparser_0.2.0
## [13] canaper_0.0.2      testthat_3.1.1    future.callr_0.7.0 future_1.23.0
## [17] spaMM_3.9.25       cachem_1.0.6      memoise_2.0.1     ggribes_0.5.3
## [21] ggtxt_0.1.1       RColorBrewer_1.1-2 patchwork_1.1.1   glue_1.6.0
```

```

## [25] clustermq_0.8.95.2 scico_1.3.0          phyloregion_1.0.6 sf_1.0-5
## [29] magrittr_2.0.1      assertr_2.8          broom_0.7.10      jintools_0.1.0
## [33] picante_1.8.2       nlme_3.1-153         maps_3.4.0        janitor_2.1.0
## [37] readxl_1.3.1        assertthat_0.2.1     here_1.0.1        FD_1.0-12
## [41] vegan_2.5-7         lattice_0.20-45      permute_0.9-5     geometry_0.4.5
## [45] ape_5.6             ade4_1.7-18          checkr_0.5.0      conflicted_1.1.0
## [49] tarchetypes_0.4.0  targets_0.9.0
##
## loaded via a namespace (and not attached):
## [1] snow_0.4-4          backports_1.4.1      fastmatch_1.1-3
## [4] plyr_1.8.6          igraph_1.2.10        sp_1.4-6
## [7] splines_4.1.2       listenv_0.8.0        digest_0.6.29
## [10] htmltools_0.5.2     foreach_1.5.1        fansi_0.5.0
## [13] cluster_2.1.2       tzdb_0.2.0           globals_0.14.0
## [16] modelr_0.1.8        clustMixType_0.2-15 colorspace_2.0-2
## [19] rvest_1.0.2         haven_2.4.3          xfun_0.29
## [22] callr_3.7.0         crayon_1.4.2         jsonlite_1.7.2
## [25] phangorn_2.8.1      iterators_1.0.13     polyclip_1.10-0
## [28] registry_0.5-1      gtable_0.3.0         abind_1.4-5
## [31] scales_1.1.1        DBI_1.1.2            Rcpp_1.0.7
## [34] gridtext_0.1.4      magic_1.5-9          units_0.7-2
## [37] proxy_0.4-26        httr_1.4.2           dismo_1.3-5
## [40] betapart_1.5.4      ellipsis_0.3.2       farver_2.1.0
## [43] pkgconfig_2.0.3     dbplyr_2.1.1         utf8_1.2.2
## [46] labeling_0.4.2      tidyselect_1.1.1     rlang_0.4.12
## [49] munsell_0.5.0       cellranger_1.1.0     tools_4.1.2
## [52] cli_3.1.0           generics_0.1.1       evaluate_0.14
## [55] fastmap_1.1.0       yaml_2.2.1           sys_3.4
## [58] processx_3.5.2      knitr_1.37           fs_1.5.2
## [61] randomForest_4.6-14 pbapply_1.5-0        slam_0.1-49
## [64] ROI_1.0-0           xml2_1.3.3           rstudioapi_0.13
## [67] compiler_4.1.2      e1071_1.7-9          reprex_2.0.1
## [70] tweenr_1.0.2        stringi_1.7.6        highr_0.9
## [73] ps_1.6.0            rgeos_0.5-9         Matrix_1.4-0
## [76] classInt_0.4-3      vctrs_0.3.8          pillar_1.6.4
## [79] lifecycle_1.0.1     BiocManager_1.30.16 data.table_1.14.2
## [82] raster_3.5-11       R6_2.5.1             bookdown_0.24
## [85] renv_0.14.0-148     KernSmooth_2.23-20  parallelly_1.30.0
## [88] codetools_0.2-18    boot_1.3-28          rcd_1.5
## [91] MASS_7.3-54         rprojroot_2.0.2     withr_2.4.3
## [94] mgcv_1.8-38         parallel_4.1.2       doSNOW_1.0.19
## [97] hms_1.1.1           terra_1.4-22         quadprog_1.5-8
## [100] grid_4.1.2          class_7.3-19         minqa_1.2.4
## [103] rmarkdown_2.11      snakecase_0.11.0     err_0.2.0
## [106] itertools_0.1-3     numDeriv_2016.8-1.1 lubridate_1.8.0

```
